# Supplementary material for: Gelatin-mediated hydrothermal synthesis of apple-like LaCO3OH hierarchical nanostructures and tunable white-light emission
Source: Royal Society of Chemistry journal article supplement (doi:10.1039/c1ce00012h), 2011-01-01
Supplement: c1ce00012h.pdf [file c1ce00012h.pdf]

## Supporting information

### Gelatin-Mediated Hydrothermal Synthesis of Apple-Like $\text{LaCO}_3\text{OH}$ Hierarchical Nanostructures and Tunable White-Light Emission

Sheng-Liang Zhong,<sup>ab\*</sup> Lin-Fei Zhang,<sup>a</sup>

Jian-Wen Jiang,<sup>a</sup> Yun-Hai Lv,<sup>a</sup> Rong Xu,<sup>a</sup> An-Wu Xu<sup>b\*</sup> Shang-Ping Wang<sup>a</sup>

<sup>a</sup>College of Chemistry and Chemical Engineering, Jiangxi Normal University, Nanchang 330022,  
The people's Republic of China

<sup>b</sup>Division of Nanomaterials and Chemistry, Hefei National Laboratory for Physical Sciences  
at Microscale, University of Science and Technology of China, Hefei, Anhui 230026, The  
People's Republic of China

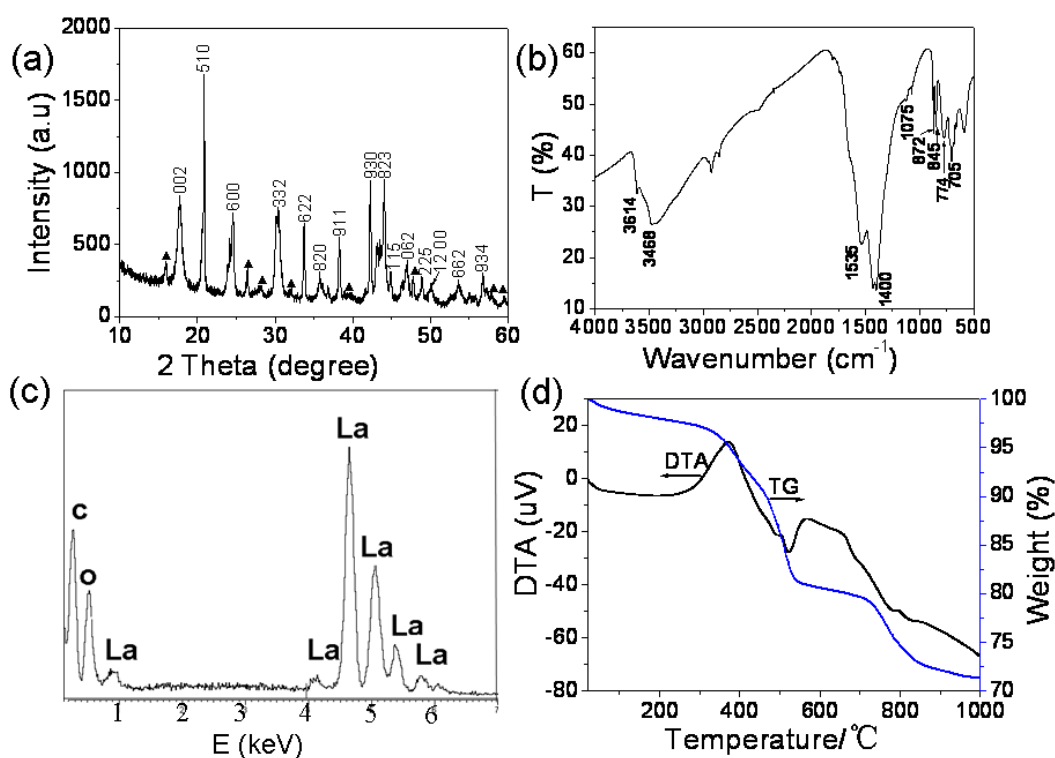

Fig. S1 (a) XRD, (b) FTIR, (c) EDS and (d) TG-DTA patterns of sample 1. The dark triangles refer to the  $\text{La}(\text{OH})_3$  peak.

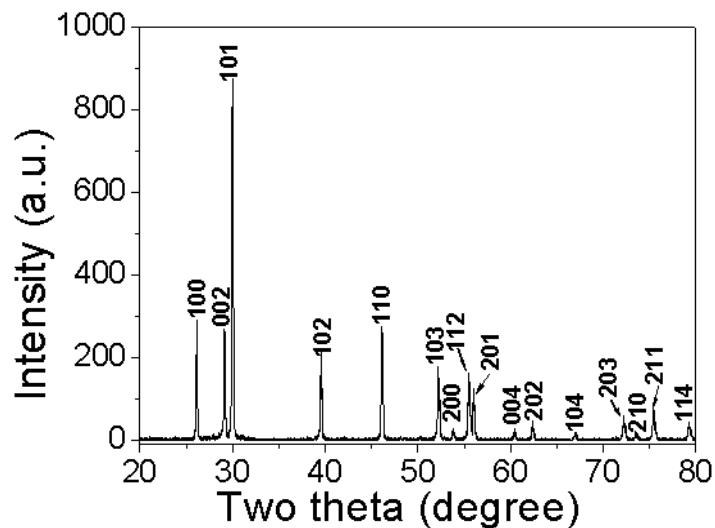

Fig. S2 XRD pattern of the product obtained after calcining sample 1 at 900 °C for 4 h.

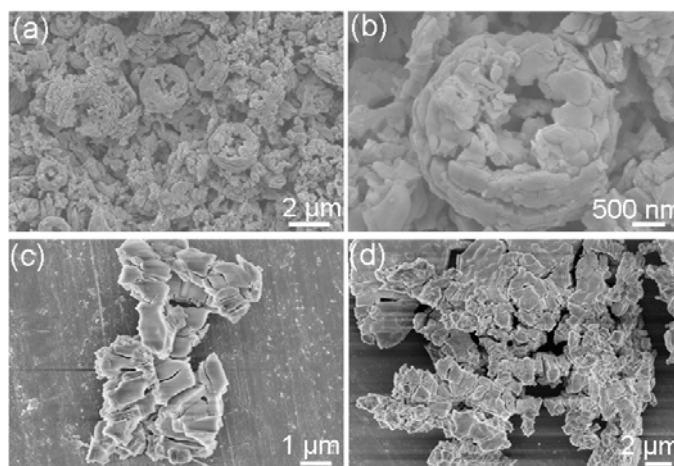

Fig. S3 SEM photos of the products obtained after calcining sample 1 at 900 °C for 4 h at different heating rate. (a) and (b) 1 °C/min ; (c) 5 °C/min ; (d) 10 °C/min.

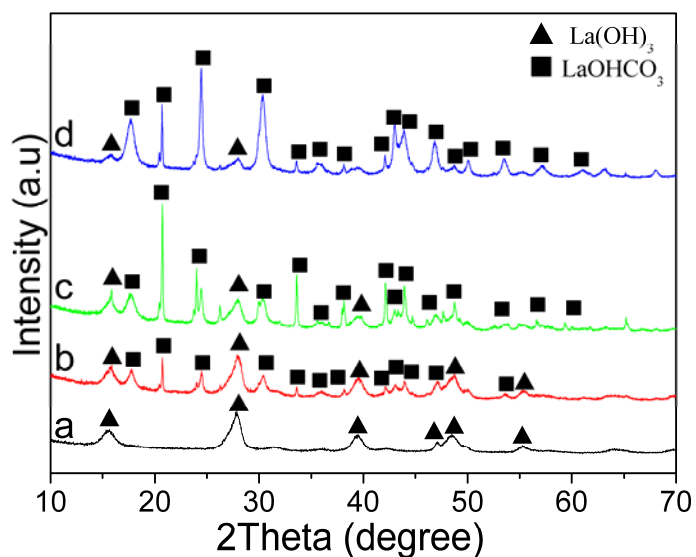

Fig. S4 XRD patterns of the samples prepared after different reaction time. (a) 1 h; (b) 3 h; (c) 24 h; (d) 72 h.

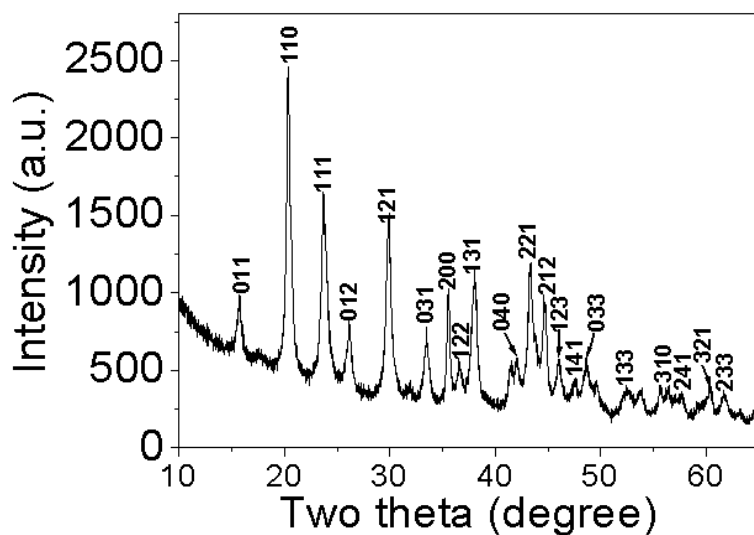

Fig. S5 XRD pattern of the sample prepared without the addition of KOH.

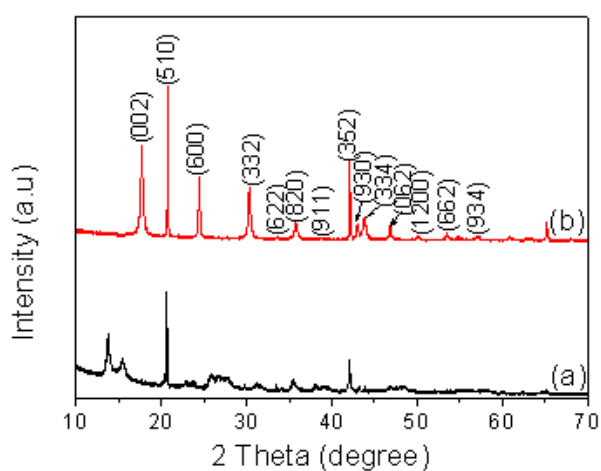

Fig. S6 XRD pattern of the product prepared at (a) 120 °C and (b) 220 °C for 48 h.

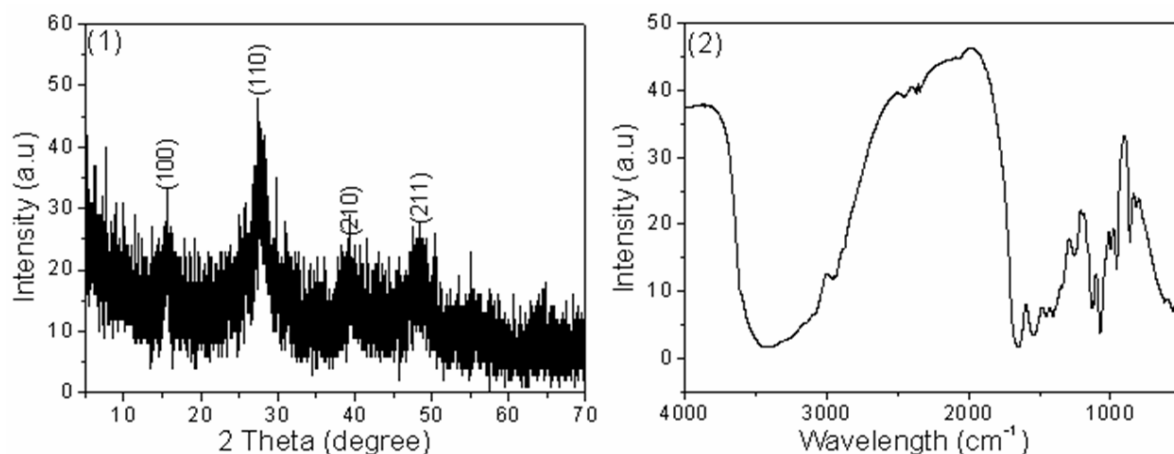

Fig. S7 (1) XRD and (2) IR of the precipitate obtained before hydrothermal treatment.

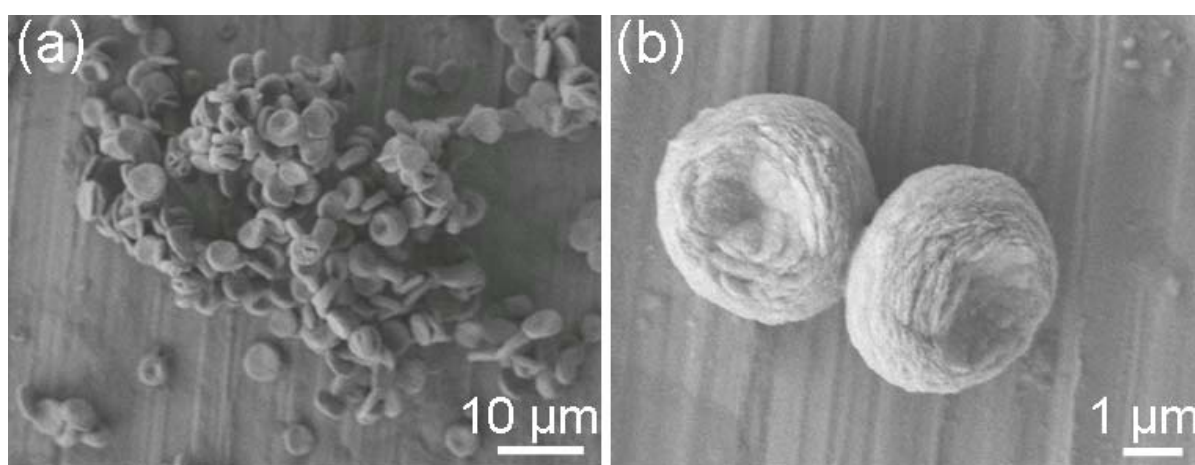

Fig. S8 SEM photos of the La(OH)CO<sub>3</sub> : Tb<sup>3+</sup> (5%) hierarchical nanostructures.

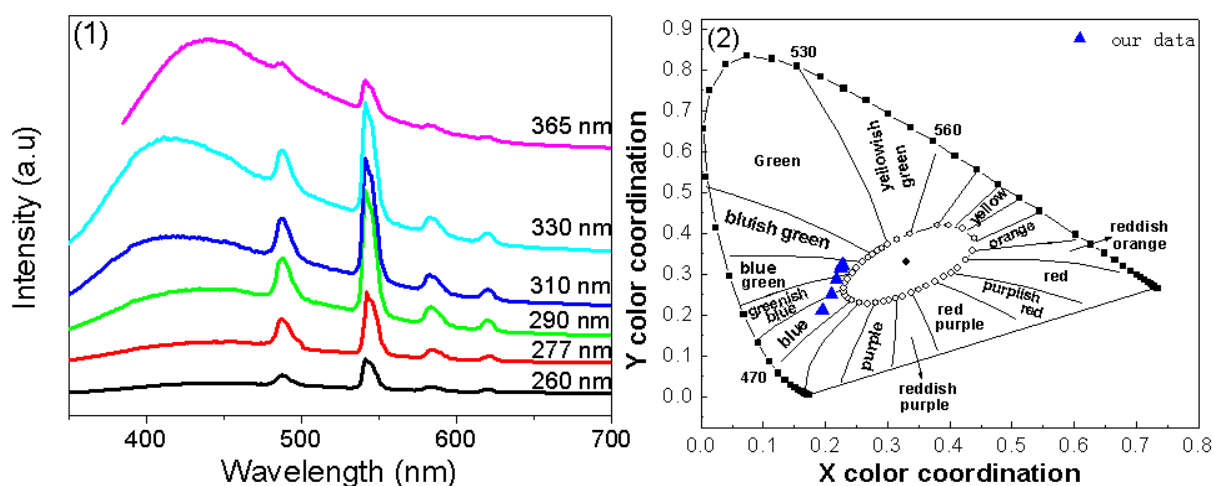

Fig. S9 (1) Emission spectra and (2) CIE chromaticity diagram of the as-prepared apple-like La(OH)CO<sub>3</sub> : Tb<sup>3+</sup> (5%) hierarchical nanostructures excited with different wavelengths.

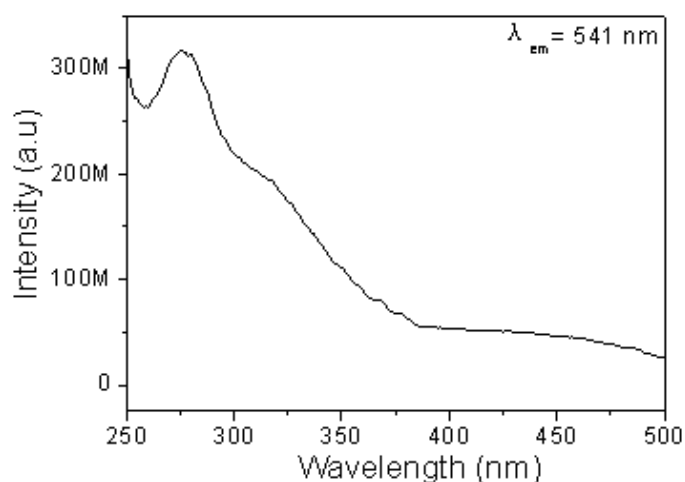

Fig. S10 Excitation spectrum of La(OH)CO<sub>3</sub> : Tb<sup>3+</sup> (5%) hierarchical nanostructures.

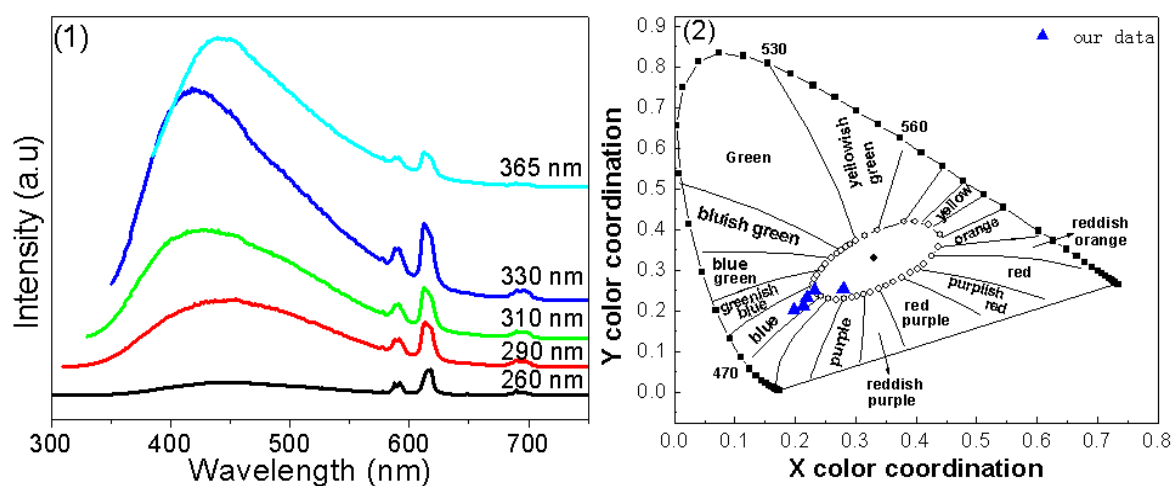

Fig. S11 Emission spectra and (2) CIE chromaticity diagram of the as-prepared apple-like La(OH)CO<sub>3</sub> : Eu<sup>3+</sup> (5%) hierarchical nanostructures excited with different wavelengths.

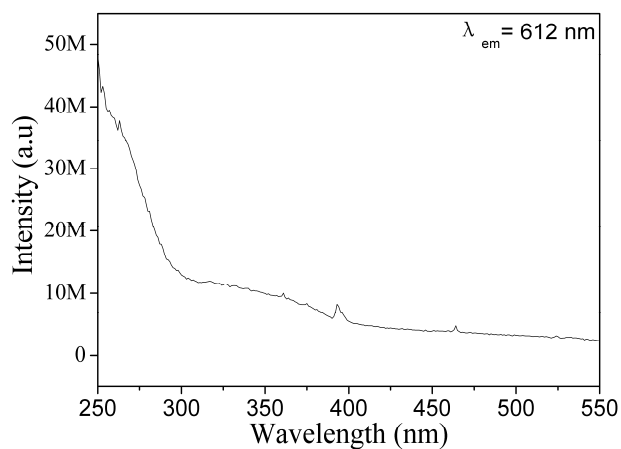

Fig. S12 Excitation spectra of La(OH)CO<sub>3</sub> : Eu<sup>3+</sup> (5%) hierarchical nanostructures.

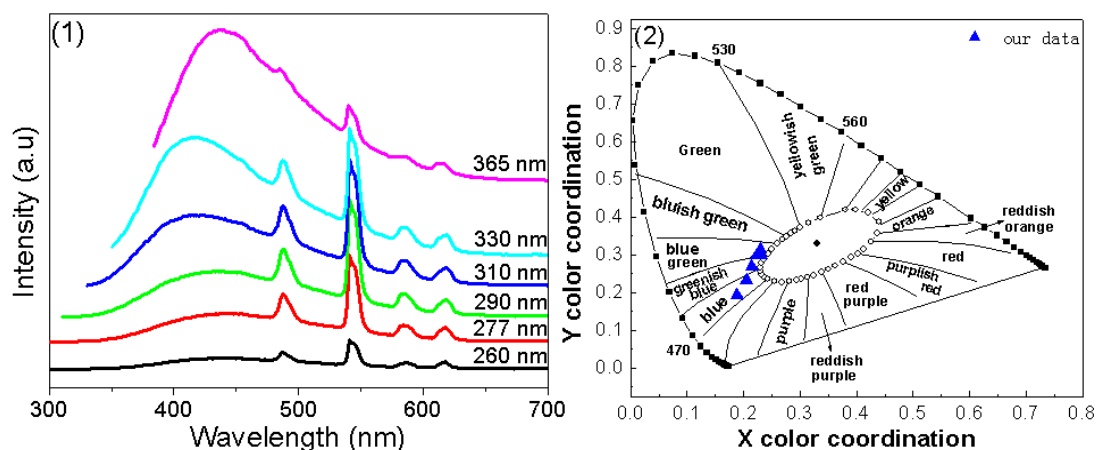

Fig. S13 (1) Emission spectra and (2) CIE chromaticity diagram of the as-prepared apple-like  $\text{La(OH)CO}_3: \text{Tb}^{3+}(5\%), \text{Eu}^{3+}(1\%)$  hierarchical nanostructures excited with different wavelengths.

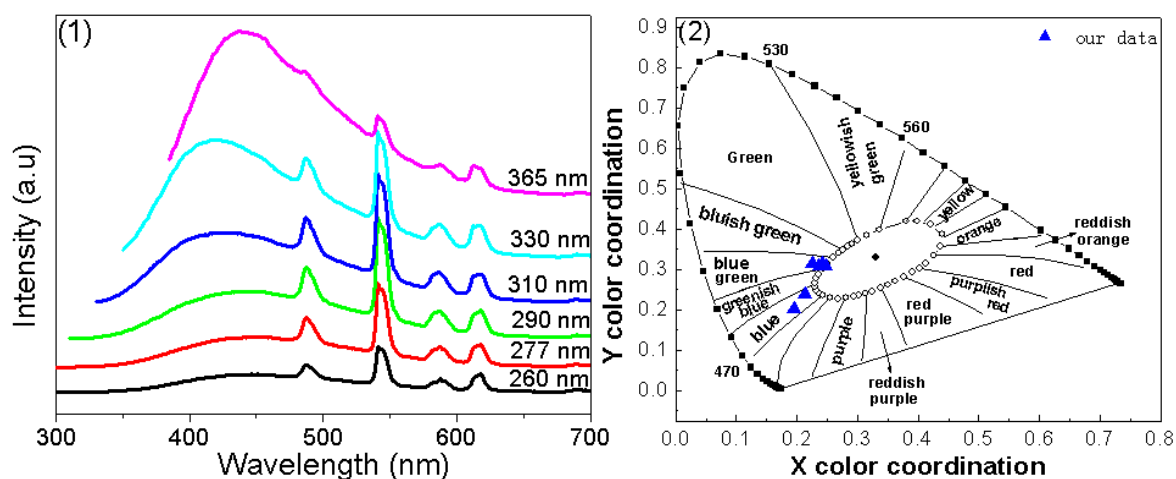

Fig. S14 (1) Emission spectra and (2) CIE chromaticity diagram of the as-prepared apple-like  $\text{La(OH)CO}_3: \text{Tb}^{3+}(5\%), \text{Eu}^{3+}(2.5\%)$  hierarchical nanostructures excited with different wavelengths.

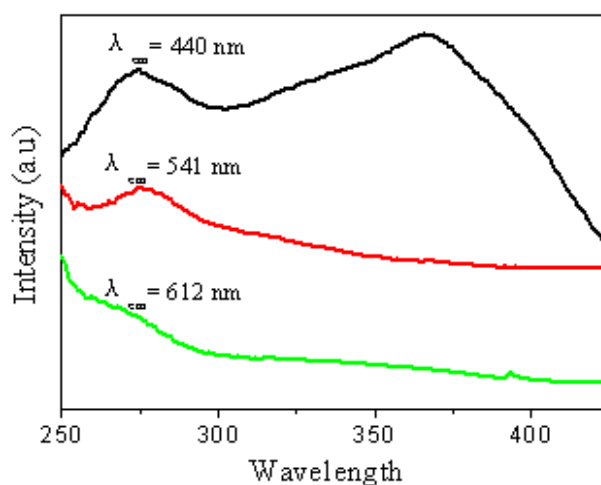

Fig. S15 Excitation spectra of  $\text{La(OH)CO}_3: \text{Tb}^{3+}(5\%), \text{Eu}^{3+}(5\%)$  hierarchical nanostructures detected at different wavelengths.
